# Supplementary material for: Targeting alternative splicing by RNAi: from the differential impact on splice variants to triggering artificial pre-mRNA splicing
Source: PubMed Central journal article supplement (PMC7826280; doi:10.1093/nar/gkaa1260), 2021-01-06
Supplement: gkaa1260_supplemental_file.pdf [file gkaa1260_supplemental_file.pdf]

## Supplementary Information

### Targeting alternative splicing by RNAi: from the differential impact on splice variants to triggering artificial pre-mRNA splicing

Armin Fuchs<sup>1</sup>, Stefan Riegler<sup>1,2</sup>, Zahra Ayatollahi<sup>1</sup>, Nicola Cavallari<sup>1</sup>, Luciana E. Giono<sup>3</sup>, Barbara A. Nimeth<sup>2</sup>, Krishna V. Mutanwad<sup>2</sup>, Alois Schweighofer<sup>4</sup>, Doris Lucyshyn<sup>2</sup>, Andrea Barta<sup>1</sup>, Ezequiel Petrillo<sup>1, 3,\*</sup>, and Maria Kalyna<sup>2,\*</sup>

<sup>1</sup>Max Perutz Laboratories, Medical University of Vienna, Vienna 1030, Austria

<sup>2</sup>Department of Applied Genetics and Cell Biology, University of Natural Resources and Life Sciences Vienna, Vienna 1190, Austria

<sup>3</sup>Instituto de Fisiología, Biología Molecular y Neurociencias (IFIBYNE), CONICET-Universidad de Buenos Aires, C1428EHA, Buenos Aires, Argentina

<sup>4</sup>Max Perutz Labs, University of Vienna, Vienna 1030, Austria

Present Address: [Nicola Cavallari], Institute of Science and Technology Austria, Klosterneuburg 3400, Austria

\* To whom correspondence should be addressed:

Dr. Maria Kalyna  
Tel: +43 1 47654-94312  
E-mail: [mariya.kalyna@boku.ac.at](mailto:mariya.kalyna@boku.ac.at)

Dr. Ezequiel Petrillo  
Tel: +54 11 45763386-307  
E-mail: [petry@fbmc.fcen.uba.ar](mailto:petry@fbmc.fcen.uba.ar) or [petry1@gmail.com](mailto:petry1@gmail.com)

The authors wish it to be known that, in their opinion, the first two authors should be regarded as joint First Authors

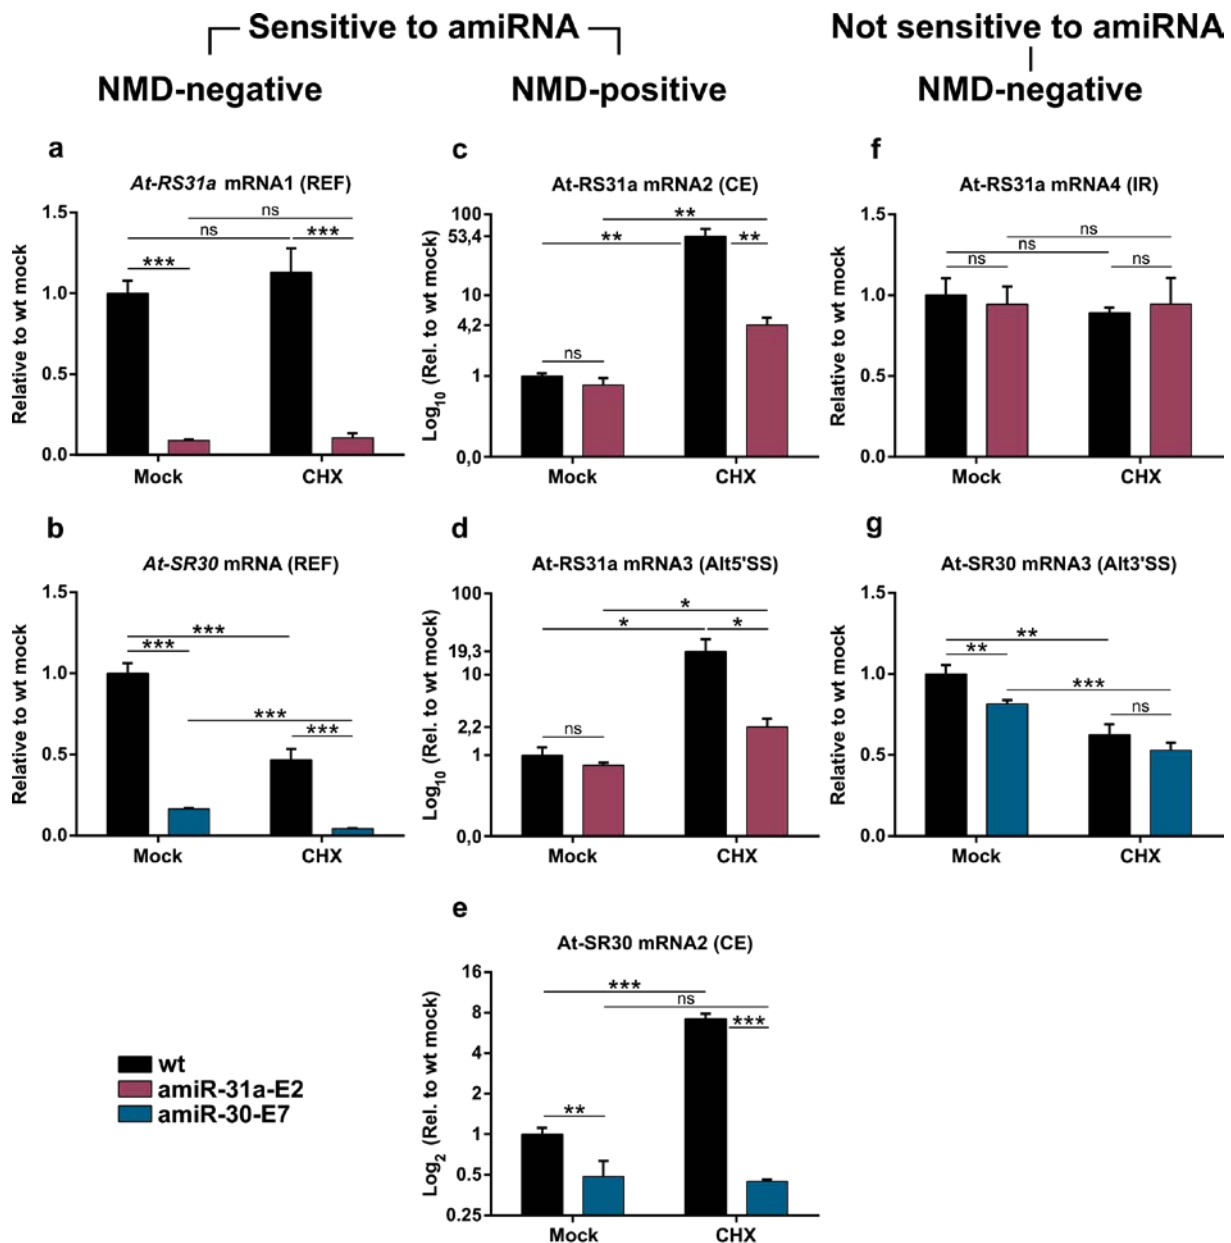

**Figure S1. Differential sensitivity of *At-RS31a* and *At-SR30* splice variants to amiRNAs and nonsense-mediated mRNA decay (NMD).** (A-G) Shown are RT-qPCR analyses of *At-RS31a* (A, C, D, F) and *At-SR30* (B, E, G) splice variants in mock- and cycloheximide-treated wild type, *amiR-31a-E2* (A, C, D, F) and *amiR-30-E7* (B, E, G) transgenic plants. Canonical (reference – REF) protein-coding isoforms are called mRNA1. Other splice variants (mRNA2-4) are generated by usage of different AS events: CE, cassette exon; Alt5'3'SS, alternative 5'/3' splice site; IR, intron retention. Each splice variant was grouped depending on its amiRNA- and NMD-sensitivity. Note that *At-RS31a* mRNA2 and mRNA3 (C, D) were plotted as Log<sub>10</sub> and *At-SR30* mRNA2 (E) as Log<sub>2</sub>. Primers were designed to specifically detect the indicated mRNA isoform (see Figures 2 and 3 and Table S2). Expression was normalized to *PP2AA3* and plotted relative to wild type. Data represent means ± standard deviation (n ≥ 3). Student's t-test, \*\*\*p < 0.001; \*\*p < 0.01; \*p < 0.05; ns, not significant.

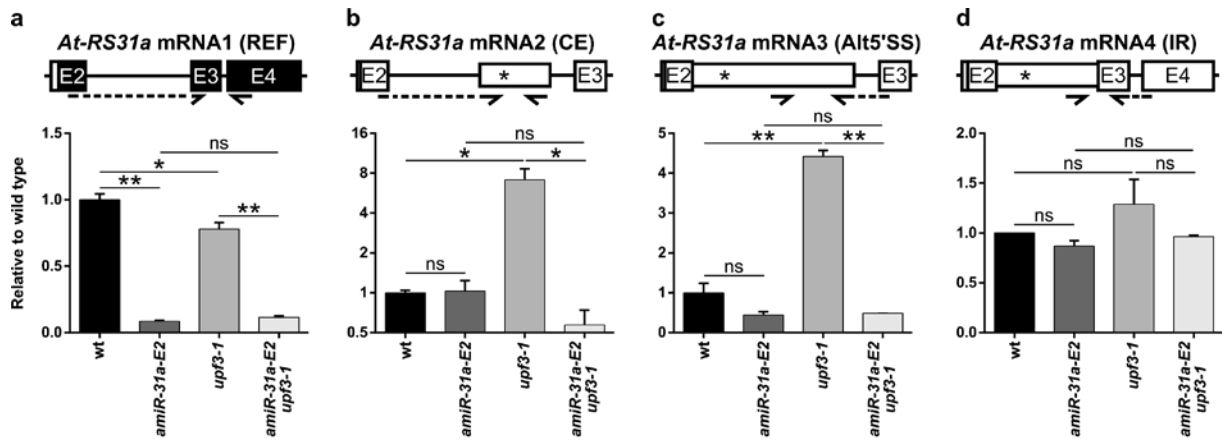

**Figure S2. Mutants with NMD impairment display effective amiRNA-mediated down-regulation of *At-RS31a* mRNA2 and mRNA3, the NMD-sensitive isoforms of the gene. (A-D)** RT-qPCR analyses of *At-RS31a* splice variants in wild type, *amiR-31a-E2*, *upf3-1* and *amiR-31a-E2/upf3-1* transgenic plants. Canonical (reference – REF) protein-coding isoforms are called mRNA1. Other splice variants (mRNA2-4) are generated by usage of different AS events: CE, cassette exon; Alt5'SS, alternative 5' splice site; IR, intron retention. NMD-sensitive splice variants (mRNA2 and mRNA3) show enhanced amiRNA-mediated down-regulation, while NMD-resistant mRNA1 and mRNA4 are not changing levels of down-regulation upon NMD impairment in *amiR-31a-E2/upf3-1* plants. Partial gene models are shown to visualize analyzed regions and primer locations. Primers are shown by arrows. Dashed arrows represent primers spanning exon junctions. Primers are listed in Table S2. Expression was normalized to *PP2AA3* and plotted relative to wild type. Data represent means  $\pm$  standard deviation ( $n \geq 3$ ). Student's t-test, \*\* $p < 0.01$ ; \* $p < 0.05$ ; ns, not significant.

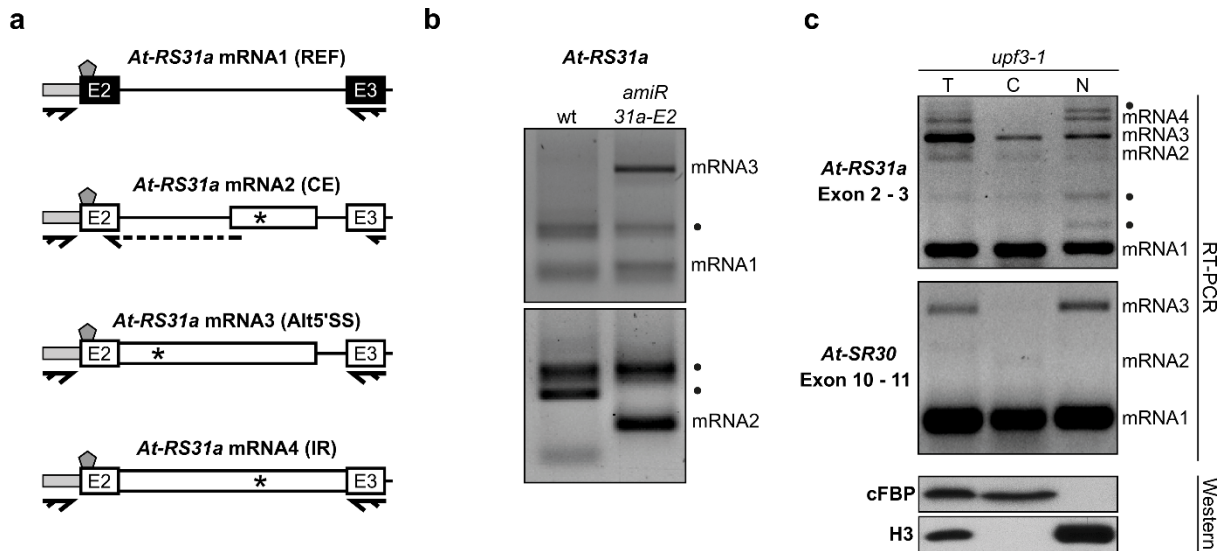

**Figure S3. Particular splice variants escape amiRNA-mediated cleavage due to nuclear retention. (A)** Partial gene models (cleaved exon 2 – intron 2 – exon 3) of *At-RS31a* are shown to visualize primer locations and regions analyzed by nested RT-PCRs. A modified 5'RLM-RACE was performed in wild type and *amiR-31a-E2* transgenic plants to detect which splice variants of *At-RS31a* were cleaved by amiR-31a-E2-RISC. The RNA adaptor fused to *At-RS31a* transcripts during the modified 5'RLM-RACE procedure is shown as a grey box. The amiRNA-target site is indicated as a pentagon. Positions of the first premature termination codon downstream of the translation start sites are shown by asterisks. Double-arrows and dashed arrows represent nested and exon junction primers, respectively (Table S2). **(B)** AmiRNA-induced mRNA cleavage shown by nested RT-PCR analyses of *At-RS31a* cleavage products in *amiR-31a-E2* transgenic plants. **(C)** Subcellular distribution of *At-RS31a* and *At-SR30* mRNA isoforms correlates with their sensitivity to the amiRNA. RT-PCR analyses of *At-RS31a* and *At-SR30* splice variants in cellular fractions of *upf3-1* mutant plants. T, total; C, cytoplasmic; N, nuclear. Purity of cellular fractions was confirmed by Western blot analyses of cytoplasmic (cFBP, cytosolic fructose-1,6-bisphosphatase) and nuclear (H3, Histone H3) markers. Non-specific products in (B) and (C) are shown by black dots.

**Table S1. Summary of amiRNAs used in this study**

| amiRNA      | Target gene                       | Gene ID                | Target region | amiRNA sequence                            | amiRNA * sequence                           | Complementarity                                              | Backbone | Vector    | Clone       | Construct ID                        |
|-------------|-----------------------------------|------------------------|---------------|--------------------------------------------|---------------------------------------------|--------------------------------------------------------------|----------|-----------|-------------|-------------------------------------|
| amiR-31a-E2 | <i>At-RS31a</i>                   | AT2G46610              | Exon 2        | ACGTA<br>CACAT<br>GTCTC<br>ATTCTT          | AAGAA<br>TGAGA<br>CTAGT<br>GTACG<br>T       | Perfect                                                      | miR159a  | ECV/pGPTV | amiR-31a-E2 | 35S::priamiRNA(RS31a-Ex2)-nosT      |
| amiR-31a/41 | <i>At-RS31a</i><br><i>At-RS41</i> | AT2G46610<br>AT5G52040 | Exon 3        | ACGGA<br>TTGCAT<br>CTCA<br>GCATC           | GATGC<br>TGAAG<br>AACCA<br>ATCCGT           | Perfect to <i>At-RS31a</i><br>2 mismatches to <i>At-RS41</i> | miR159a  | ECV/pGPTV | amiR-31a/41 | 35S::priamiRNA(RS31a/RS41-Ex3)-nosT |
| amiR-31a-E4 | <i>At-RS31a</i>                   | AT2G46610              | Exon 4        | AGGCC<br>TCGAT<br>TCGAG<br>ACTGC           | GCACT<br>CTCGA<br>AAGAG<br>AGGCC<br>T       | Perfect                                                      | miR159a  | ECV/pGPTV | amiR-31a-E4 | 35S::priamiRNA(RS31a-Ex4)-nosT      |
| amiR-30-E7  | <i>At-SR30</i>                    | AT1G09140              | Exon 7        | ATCTTA<br>GTTGCT<br>ATAAT<br>CCGCG<br>ACCC | GGGGT<br>AGCGG<br>ATTATA<br>CCAAC<br>TATGAT | 2 mismatches                                                 | miR319a  | pAMIR     | CSHL_011244 | 35S::priamiRNA(SR30-Ex7)-nosT       |

**Table S2. Primers for PCRs, RT-PCR and RT-qPCR as well as RNA probes used for Northern blotting**

| #  | Orientation | Sequence 5'-3'                                                    | Method     | Gene/Purpose                      |
|----|-------------|-------------------------------------------------------------------|------------|-----------------------------------|
| 1  | F, E1       | GTCGTCGTCGTCTTCTAGGG                                              | RT-PCR     | At-RS31a                          |
| 2  | F, E2       | AAGTTCGGGAGAGTGAAGCG                                              | RT-PCR     | At-RS31a                          |
| 3  | R, E3       | TGATAACTTGCCTCGCCCAT                                              | RT-PCR     | At-RS31a                          |
| 4  | R, E6       | TGCTCTTTGAATCGGGACC                                               | RT-PCR     | At-RS31a                          |
| 5  | F, E1       | ACGGCCGGTACGATTTTTCA                                              | RT-PCR     | At-RS41                           |
| 6  | R, E11      | AGCTGCGCTCGTAAACATCT                                              | RT-PCR     | At-RS41                           |
| 7  | F, E1       | ACGTTGGGAATTTGCTTGAGA                                             | RT-PCR     | At-SR30                           |
| 8  | F, E10      | CTTAGTCGTTCTCGCTCGCT                                              | RT-PCR     | At-SR30                           |
| 9  | R, E11      | GGTGAAACTGGAGAATTCGATCTTG                                         | RT-PCR     | At-SR30                           |
| 10 | F           | GGTTGTTTCGTCACCTGCGGCC                                            | RT-PCR     | UPF3                              |
| 11 | R           | TGCTGTAGTCTTCCGGGGACA                                             | RT-PCR     | UPF3                              |
| 12 | F           | ACACCATCGACAATGTCAAGGCCA                                          | RT-PCR     | UBQ                               |
| 13 | R           | CCTGCAGTTGACAGCTCTTGGGT                                           | RT-PCR     | UBQ                               |
| 14 | F, E4/5     | CTTGATTCTACACACAACAGCAAAT                                         | RT-qPCR    | At-RS31a total mRNA               |
| 15 | R, E5       | TAGGACGCCTCCGATACACT                                              | RT-qPCR    | At-RS31a total mRNA               |
| 16 | F, E2/3     | GTTGATATGAAGTCTGGTTATG                                            | RT-qPCR    | At-RS31a mRNA1                    |
| 17 | R, E4       | TTTCCATCACGAGGCTTCCC                                              | RT-qPCR    | At-RS31a mRNA1                    |
| 18 | F, E2/I2    | AGTTGATATGAAGTCTGGAG                                              | RT-qPCR    | At-RS31a mRNA2                    |
| 19 | R, I2       | TAGGCATGAGAAAATGTAGG                                              | RT-qPCR    | At-RS31a mRNA2                    |
| 20 | F, I2       | GTATGTAAGTGTGTTTGG                                                | RT-qPCR    | At-RS31a mRNA3                    |
| 21 | R, I2/E3    | CACAAAAGCATAACCTGCATC                                             | RT-qPCR    | At-RS31a mRNA3                    |
| 22 | F, I2       | GCATTGCAATTTCTGTGGGC                                              | RT-qPCR    | At-RS31a mRNA4                    |
| 23 | R, E3/4     | TTCACCCTGAAAGTCCTTGG                                              | RT-qPCR    | At-RS31a mRNA4                    |
| 24 | F, E1/3     | CTCTCAGATTCTCAAGGTATG                                             | RT-qPCR    | At-RS31a mRNA-E2S                 |
| 25 | R, E4       | GACTGCCTTCCATCACGAG                                               | RT-qPCR    | At-RS31a mRNA-E2S                 |
| 26 | F, E1/2     | CTTCAGATTCTTCAAGGAAT                                              | RT-qPCR    | At-RS31a, amiR-31a-E2 target site |
| 27 | R, E2       | TCACTCTCCGAACCTGC                                                 | RT-qPCR    | At-RS31a, amiR-31a-E2 target site |
| 28 | F, E3       | TGCTTTTGTGTATTTGAG                                                | RT-qPCR    | At-RS31a, amiR-31a/41 target site |
| 29 | R, E3/4     | TTCACCCTGAAAGTCCTTGG                                              | RT-qPCR    | At-RS31a, amiR-31a/41 target site |
| 30 | F, E3/4     | AGTTGAATGGGCCAAGGAC                                               | RT-qPCR    | At-RS31a, amiR-31a-E4 target site |
| 31 | R, E4       | GAACATTGAGAAGTTTACC                                               | RT-qPCR    | At-RS31a, amiR-31a-E4 target site |
| 32 | F, E4/5     | GGATGCTACAAATCCAGTAAAG                                            | RT-qPCR    | At-RS41 total mRNA                |
| 33 | R, E5       | TCCACTGAGATCACCTTATCC                                             | RT-qPCR    | At-RS41 total mRNA                |
| 34 | F, E2/3     | TTGATATGAAAGTGGGTTTG                                              | RT-qPCR    | At-RS41 mRNA1                     |
| 35 | R, E4       | AACAGAGTCTTGGAAGGTC                                               | RT-qPCR    | At-RS41 mRNA1                     |
| 36 | F, E3       | GTTTGCTTTTGTCTATATGG                                              | RT-qPCR    | At-RS41, amiR-31a/41 target site  |
| 37 | R, E3/4     | ACCTCCACGGTCATTTCTTTG                                             | RT-qPCR    | At-RS41, amiR-31a/41 target site  |
| 38 | F, E9/10    | AGTAGCAAGAGCAGAGTGTG                                              | RT-qPCR    | At-SR30 total mRNA                |
| 39 | R, E10      | TATAGCCGAGCGAAGCAC                                                | RT-qPCR    | At-SR30 total mRNA                |
| 40 | F, E10/11   | ACAGCTCTGTCTCAAGGTCC                                              | RT-qPCR    | At-SR30 mRNA1                     |
| 41 | R, E12      | GCTTGAGACGATTCCGGGTAC                                             | RT-qPCR    | At-SR30 mRNA1                     |
| 42 | F, E10/I10  | TACAGCTCTGTCTCAAGATC                                              | RT-qPCR    | At-SR30 mRNA2                     |
| 43 | R, I10/E11  | ATTTTGATCTTGATTGGGACAG                                            | RT-qPCR    | At-SR30 mRNA2                     |
| 42 | F, E10/I10  | TACAGCTCTGTCTCAAGATC                                              | RT-qPCR    | At-SR30 mRNA3                     |
| 44 | R, I10      | GAGGAATCAGAGTAATCATAG                                             | RT-qPCR    | At-SR30 mRNA3                     |
| 45 | F, E5       | ATTACCGCCTTCTGCTTCGTG                                             | RT-qPCR    | At-SR30, amiR-30-E7 target site   |
| 46 | R, E8/9     | TCGACTCATATTCCTCACCC                                              | RT-qPCR    | At-SR30, amiR-30-E7 target site   |
| 47 | F, E12      | TAACGTGGCCAAAATGATGC                                              | RT-qPCR    | PP2AA3                            |
| 48 | R, E13      | GTTCTCCACAACCCTTGGT                                               | RT-qPCR    | PP2AA3                            |
| 49 | R, E3       | GCCCATTCAACTGATAACTGCGTCGCC                                       | 5'RLM-RACE | At-RS31a, first PCR               |
| 50 | R, E3       | CTACGGATTGCATCTTCAGCATCGCCG                                       | 5'RLM-RACE | At-RS31a, nested PCR              |
| 51 | R, E2/I2    | CATGCTCCTTTAGAGAAAAGTCCAGAC                                       | 5'RLM-RACE | At-RS31a, nested PCR              |
| 52 | F           | ATCGGCTAGCTGGAAGAAGATGAGACTAGTGTACGTATGAGTTGAGC<br>AGGGTAAAG      | PCR        | Generation of amiR-31a-E2         |
| 53 | R           | GCTATGTACAAGAAGATGAAGAATGAGACATGTGTACGTGAAGAGTAAA<br>AGCCATTAAGGG | PCR        | Generation of amiR-31a-E2         |
| 54 | F           | ATCGGCTAGCTGGAAGGATGCTGAAGAACCAATCCGTATGAGTTGAGC<br>AGGGTAAAG     | PCR        | Generation of amiR-31a/41         |

|     |          |                                                                  |          |                                          |
|-----|----------|------------------------------------------------------------------|----------|------------------------------------------|
| 55  | R        | GCTATGTACAAGAAGATGGATGCTGAAGATGCAATCCGTGAAGAGTAA<br>AGCCATTAAGGG | PCR      | Generation of amiR-31a/41                |
| 56  | F        | ATCGGCTAGCTGGAAGGCAGTCTCGAAAGAGAGGCCTCATGAGTTGAGC<br>AGGGTAAAG   | PCR      | Generation of amiR-31a-E4                |
| 57  | R        | GCTATGTACAAGAAGATGGCAGTCTCGAATCAGAGGCCTGAAGAGTAA<br>AGCCATTAAGGG | PCR      | Generation of amiR-31a-E4                |
| 58  | R        | TCTACCCGAGGCAGTTGCAT                                             | PCR      | pre-amiR-31a detection                   |
| 59  | F        | CCACTATCCTTCGCAAGACCCCTTCCT                                      | PCR      | Genotyping amiR-30-<br>E7/CSHL_011244    |
| 60  | R        | ACCGGCGGTAAGGATCTGAGC                                            | PCR      | Genotyping amiR-30-<br>E7/CSHL_011244    |
| 61  | F        | AGCAATTCCTCAAAAAGGTCC                                            | PCR      | Genotyping henl-<br>6/SALK_090960        |
| 62  | R        | GCCAAACATCCTGTTGAAAAG                                            | PCR      | Genotyping henl-<br>6/SALK_090960        |
| 63  | F        | CAGTTCAATCAATGGGCATC                                             | PCR      | CAPS assay henl-1                        |
| 64  | R        | CATCTTCTTTGTTCCACTCCC                                            | PCR      | CAPS assay henl-1                        |
| 65  | F        | TAGTCTCATCAAGTTATGTCT                                            | PCR      | CAPS assay henl-8                        |
| 66  | R        | GCAGAGAAGCGTGTCAATC                                              | PCR      | CAPS assay henl-8                        |
| 67  | F        | ACGTACACATGTCTCATTCTTCTGTCTC                                     | Northern | amiR-31a-E2 RNA probe<br>construction    |
| 68  | F        | ACGGATTGCATCTTCAGCATCCCTGTCTC                                    | Northern | amiR-31a/41 RNA probe<br>construction    |
| 69  | F        | AGGCCTCTGATTGAGACTGCCCTGTCTC                                     | Northern | amiR-31a-E4 RNA probe<br>construction    |
| 70  | F        | ATCTTAGTTGCTATAATCCGCGACCCCCCTGTCTC                              | Northern | amiR-30-E7 RNA probe<br>construction     |
| 71  | F        | TGGCCCTGCGCAAGGATGACCTGTCTC                                      | Northern | U6 RNA probe construction                |
| 72  | F, E2    | ACGGCGAGATGGCAGTTACG                                             | RT-PCR   | Human SRSF4, splicing                    |
| 73  | R, E4    | TTGTGAGCATCTGCATAAGTC                                            | RT-PCR   | Human SRSF4, splicing                    |
| 74  | F, E1    | TGGAGGTGGATCTGAAGAAC                                             | RT-qPCR  | Human SRSF4 total mRNA                   |
| 75  | R, E2    | GTTCATAAACAGCATCATCTG                                            | RT-qPCR  | Human SRSF4 total mRNA                   |
| 76  | F, E2jE3 | TTACGGTTCTGGACGCAGTG                                             | RT-qPCR  | Human SRSF4 REF mRNA                     |
| 77  | R, E4    | TCCAAGCTCTTTTCATATCAG                                            | RT-qPCR  | Human SRSF4 REF mRNA & IR                |
| 78  | F, I2jE3 | TATTGAACCTTCCAAAGGTG                                             | RT-qPCR  | Human SRSF4 IR                           |
| 79  | F        | TACAAAAAAGCAGGCTCCACTCTTTGTCTTCTCCAGTTAAAC                       | PCR      | Generation of<br>35S::miR156a            |
| 80  | R        | GCTGGGTCTAGATATCTCGACAAGAGACAGAGAAAAG                            | PCR      | Generation of<br>35S::miR156a            |
| 81  | F, E3    | CTGAGTTTGATGAGAAGAAACG                                           | RT-PCR   | At-SPL2                                  |
| 82  | R, E5    | TACGGGTTGGAGGTTGCTTGAGG                                          | RT-PCR   | At-SPL2                                  |
| 83  | F, E2    | GGCATAGAGTTTGCAGGGCT                                             | RT-PCR   | At-SPL6                                  |
| 84  | R, E4    | TGGTTGGGTTGGGTGATTGA                                             | RT-PCR   | At-SPL6                                  |
| 85  | F, E4    | TTCCGATACCGAGCACAAATAG                                           | RT-qPCR  | At-SPL2, total mRNA                      |
| 86  | F, E3-4j | ATCCTGGAAGGACATATGATG                                            | RT-qPCR  | At-SPL2, REF                             |
| 87  | F, I3    | CATTTTCATGTAGTTTGGGG                                             | RT-qPCR  | At-SPL2, IR                              |
| 88  | R, E5    | TACGGGTTGGAGGTTGCTTGAGG                                          | RT-qPCR  | At-SPL2, total & REF & IR                |
| 89  | F, E4    | GAAGACGACCACCGTACAAGT                                            | RT-qPCR  | At-SPL6, total mRNA                      |
| 90  | F, E3-4j | TCGCACCTCTCAAGATGTAG                                             | RT-qPCR  | At-SPL6, REF                             |
| 91  | F, I3    | TCTCTGCCTTTTCCTATCCA                                             | RT-qPCR  | At-SPL6, IR                              |
| 92  | R, E4    | TGGTTGGGTTGGGTGATTGA                                             | RT-qPCR  | At-SPL6, total & REF & IR                |
| 93  | F, E1    | AAACCATGGCTTTTCGGTTCATCATTATAAG                                  | PCR      | Generation of C1, C2 and<br>C3 minigenes |
| 94  | R, E3    | AAAGGATCCCTTGCCCATCAACTGATAAC                                    | PCR      | Generation of C1, C2 and<br>C3 minigenes |
| 95  | F, E2    | TTCTATGCGTCACGTCTATGTTGGGAATTCGACTATGATAC                        | PCR      | Generation of C1, C2 and<br>C3 minigenes |
| 96  | R, E2    | ACATAGACGTGACGCATAGAAGCAAAAGCAATCGAATTCCTAAC                     | PCR      | Generation of C1, C2 and<br>C3 minigenes |
| 97  | F, E2    | AAGAATGAGACATGTGTACGTAGCAAGTTCGGGAGAGTGAAG                       | PCR      | Generation of C1, C2 and<br>C3 minigenes |
| 98  | R, E2    | ACGTACACATGTCTCATTCTTGGCGAGTATCATAGTCGAAATTC                     | PCR      | Generation of C1, C2 and<br>C3 minigenes |
| 99  | F, E2    | AAGAATGAGACATGTGTACGTGTTGATATGAAGTCTGGTAAAAC                     | PCR      | Generation of C1, C2 and<br>C3 minigenes |
| 100 | R, E2    | ACGTACACATGTCTCATTCTTGGTGAACAATCTTTCAAGATC                       | PCR      | Generation of C1, C2 and<br>C3 minigenes |
| 101 | R        | AGATGAACTTCAGGTCAG                                               | RT-PCR   | GFP                                      |

F, forward; R, reverse; E, exon; I, intron; j, junction.
